# Supplementary material
Source: PubMed Central journal article supplement (PMC4179598)
Supplement: bi5005393_si_001.pdf [file bi5005393_si_001.pdf]

Supporting Information for:

## Proton Association Constants of His-37 in the Influenza-A M2<sub>18-60</sub> Dimer-of-Dimers

Michael T. Colvin,<sup>†</sup> Loren B. Andreas,<sup>†</sup> James J. Chou<sup>‡</sup>, and Robert G. Griffin<sup>†\*</sup>

<sup>†</sup>*Department of Chemistry and Center for Magnetic Resonance, Francis Bitter Magnet Laboratory, Massachusetts Institute of Technology, Cambridge, Massachusetts, 02139 and*

<sup>‡</sup>*Department of Biological Chemistry and Molecular Pharmacology, Harvard Medical School, Boston, Massachusetts 02115*

Email [rgg@mit.edu](mailto:rgg@mit.edu)

**Table S1.** Ratio of protonated nitrogens to unprotonated nitrogen as a function of pH at the temperatures indicated.

| pH  | $I_{\text{NH}}/I_{\text{N}}(-6^{\circ}\text{C})$ | His/His <sup>+</sup> (-6°C) | $I_{\text{NH}}/I_{\text{N}}(37^{\circ}\text{C})$ | His/His <sup>+</sup> (37°C) |
|-----|--------------------------------------------------|-----------------------------|--------------------------------------------------|-----------------------------|
| 3.5 | inf                                              | 0.00                        | inf                                              | 0.00                        |
| 4.5 | 6.33                                             | 0.61                        | 29.75                                            | 0.10                        |
| 5.5 | 3.28                                             | 1.40                        | 4.91                                             | 0.85                        |
| 6.5 | 3.05                                             | 1.64                        | 4.10                                             | 1.10                        |
| 7.5 | 2.15                                             | 2.96                        | 3.51                                             | 1.43                        |
| 8.5 | 1.464                                            | 52.2                        | 1.88                                             | 5.67                        |

(a) -6°C

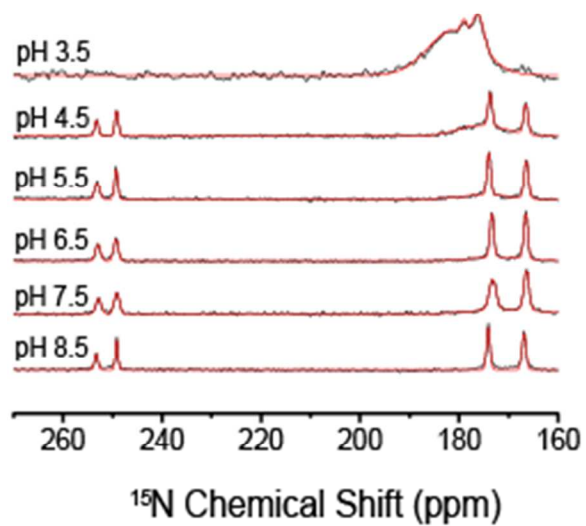

(b) 37°C

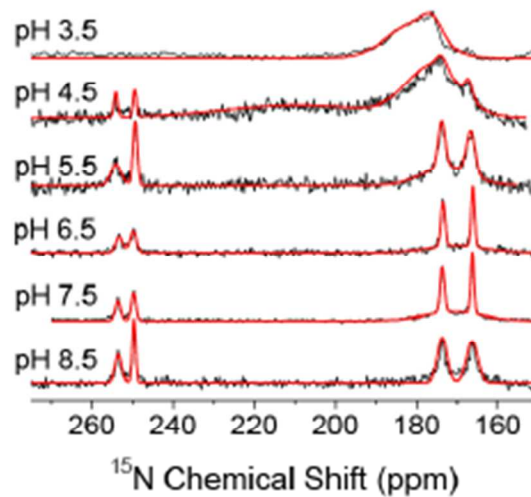

**Figure S1.**  $^{15}\text{N}$  MAS NMR spectra of M2<sub>18-60</sub> H<sub>57</sub>Y ILFY reverse labeled at pH indicated. (a) at -6°C, and (b) at 37°C.

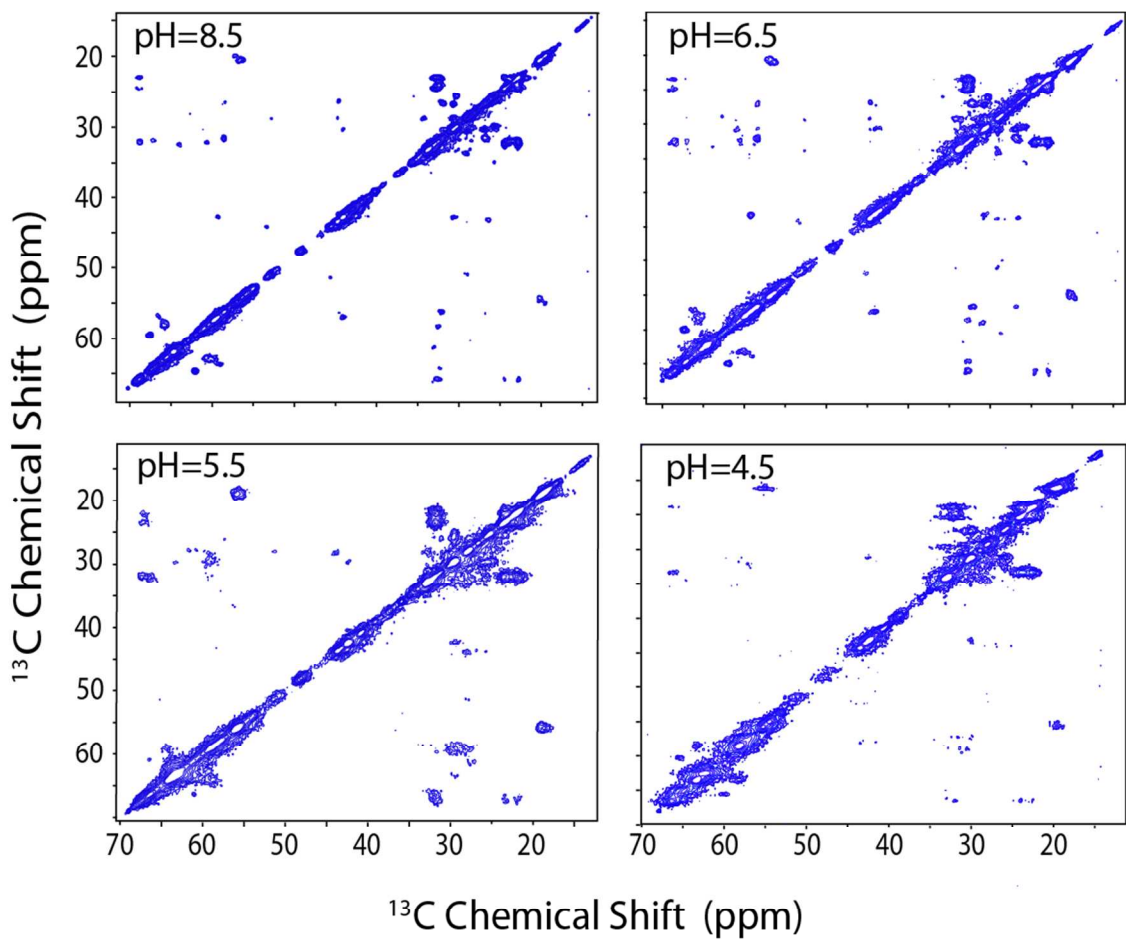

**Figure S2.** 2D  $^{13}\text{C}$ - $^{13}\text{C}$  20 ms PDS spectra of M2<sub>18-60</sub> -6°C,  $\omega_r/2\pi=12.5$  kHz, 700 MHz  $^1\text{H}$  frequency at pH indicated.

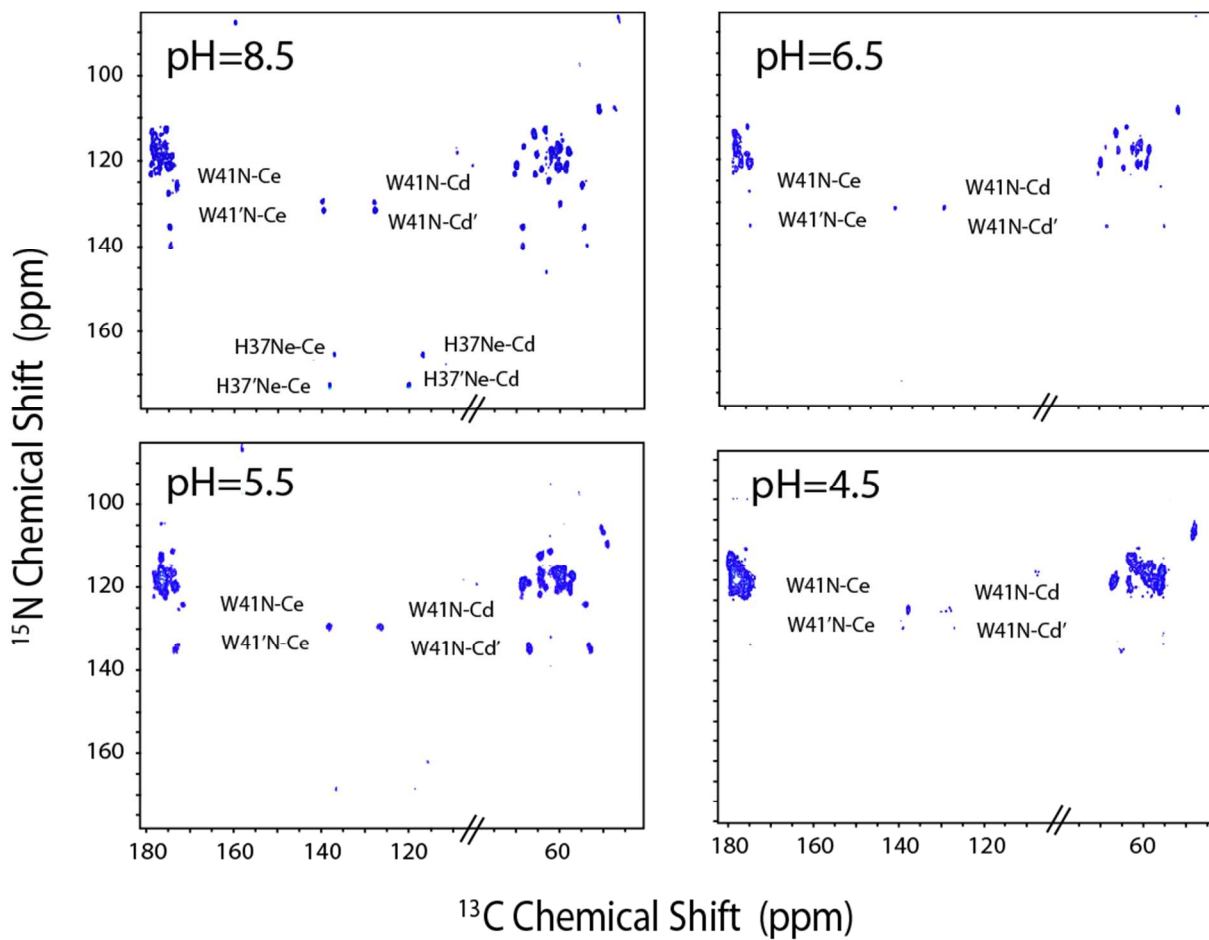

**Figure S3.** 2D  $^{13}\text{C}$ - $^{15}\text{N}$  3.2 ms zf-TEDOR spectra of  $\text{M}_{218-60}$  at  $-6^\circ\text{C}$ ,  $\omega_r/2\pi = 12.5$  kHz 700 MHz  $^1\text{H}$  frequency at pH indicated.

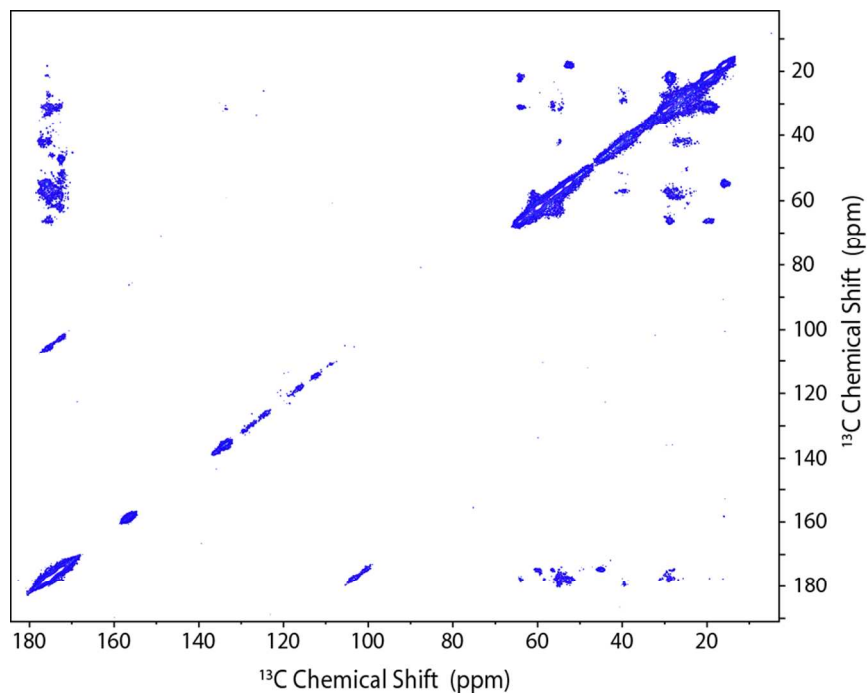

**Figure S4.** 2D 20 ms  $^{13}\text{C}$ - $^{13}\text{C}$  PDS spectrum of M2<sub>18-60</sub> at  $\omega_{0\text{H}}/2\pi=700$  MHz,  $\omega_r/2\pi=12.5$  kHz, pH =6.5 at T=-45°C.

References:

- (1) Andreas, L. B.; Eddy, M. T.; Chou, J. J.; Griffin, R. G. *J Am Chem Soc* **2012**, *134*, 7215.
- (2) Andreas, L. B.; Eddy, M. T.; Pielak, R. M.; Chou, J.; Griffin, R. G. *J Am Chem Soc* **2010**, *132*, 10958.
- (3) Jaroniec, C. P.; Filip, C.; Griffin, R. G. *J Am Chem Soc* **2002**, *124*, 10728.
